# Supplementary material for: Germline Genetic Mutations in Adult Patients with Sarcoma: Insight into the Middle East Genetic Landscape
Source: MDPI journal article supplement (doi:10.3390/cancers16091668), 2024-04-25
Supplement: s1 [file s1]

**Supplementary Table S2:** Details of pathogenic/likely pathogenic germline mutations:

| Genes  | Types                    | Exon/<br>Intron | Nucleotide<br>Changes | Amino Acid<br>Change | Variant<br>Type | Gender | Stage      | Location      | Family<br>History | 2 <sup>nd</sup><br>Primary<br>tumors |
|--------|--------------------------|-----------------|-----------------------|----------------------|-----------------|--------|------------|---------------|-------------------|--------------------------------------|
| APC    | Increased<br>Risk Allele | Exon 16         | c.3920T>A             | p.Ile1307Lys         | Missense        | Female | Localized  | Lower<br>Limp | Positive          | None                                 |
| APC    | Increased<br>Risk Allele | Exon 16         | c.3920T>A             | p.Ile1307Lys         | Missense        | Male   | Localized  | Lower<br>Limp | Positive          | None                                 |
| APC    | Increased<br>Risk Allele | Exon 16         | c.3920T>A             | p.Ile1307Lys         | Missense        | Female | Localized  | Lower<br>Limp | Positive          | None                                 |
| APC    | Increased<br>Risk Allele | Exon 16         | c.3920T>A             | p.Ile1307Lys         | Missense        | Female | Metastatic | Upper<br>limp | Negative          | None                                 |
| APC    | Pathogenic               | Exon 16         | c.4393_4394d<br>el    | p.Ser1465Trpfs*3     | Deletion        | Female | Localized  | Lower<br>Limp | Positive          | FAP                                  |
| BRCA1  | Pathogenic               | Exon 11         | c.4117G>T             | p.Glu1373*           | Nonsense        | Female | Localized  | Upper<br>limp | Positive          | None                                 |
| BRCA2  | Pathogenic               | Exon 11         | c.5351dup             | p.Asn1784Lysfs*3     | Duplication     | Female | Localized  | Upper<br>limp | Positive          | Breast                               |
| BRCA2  | Pathogenic               | Exon 11         | c.2254_2257d<br>el    | p.Asp752Phefs*19     | Deletion        | Female | Localized  | Upper<br>limp | Positive          | Breast                               |
| BRIP1  | Likely<br>Pathogenic     | Exon 20         | c.3260dup             | p.Asn1087Lysfs*4     | Duplication     | Female | Localized  | Upper<br>limp | Negative          | None                                 |
| BRIP1  | Pathogenic               | Exon 9          | c.1315C>T             | p.Arg439*            | Nonsense        | Female | Localized  | Upper<br>limp | Positive          | Breast                               |
| CDKN2A | Likely<br>Pathogenic     | Exon 1          | c.172C>T              | p.Gln58*             | Nonsense        | Male   | Localized  | Upper<br>limp | Positive          | None                                 |

|       |            |                                        |                                        |                                        |          |        |            |            |          |            |
|-------|------------|----------------------------------------|----------------------------------------|----------------------------------------|----------|--------|------------|------------|----------|------------|
| CHEK2 | Pathogenic | Exon 4                                 | c.470T>C                               | p.Ile157Thr                            | Missense | Male   | N/A        | Upper limb | Positive | None       |
| MUTYH | Pathogenic | Exon 7                                 | c.545G>A                               | p.Arg182His                            | Missense | Male   | Metastatic | Lower Limb | Positive | Colorectal |
| NF1   | Pathogenic | Exons 9-35                             | Deletion                               | Deletion                               | Deletion | Female | Localized  | Upper limb | Positive | None       |
| NF1   | Pathogenic | Exon 13                                | c.1466A>G                              | (p.Tyr489Cys)                          | Missense | Female | Localized  | Upper limb | Negative | Breast     |
| NF1   | Pathogenic | Deletion of the Entire coding sequence | Deletion of the Entire coding sequence | Deletion of the Entire coding sequence | Deletion | Female | Metastatic | Lower Limb | Positive | None       |
| PALB2 | Pathogenic | Exon 4                                 | c.487_488del                           | p.Val163Leufs*4                        | Deletion | Female | Localized  | Upper limb | Negative | Lymphoma   |
| TP53  | Pathogenic | Exon 5                                 | c.422G>A                               | p.Cys141Tyr                            | Missense | Female | localized  | Upper limb | Positive | Breast     |
| TP53  | Pathogenic | Exon 5                                 | c.541C>T                               | p.Arg181Cys                            | Missense | Female | Metastatic | Lower Limb | Positive | None       |
| TP53  | Pathogenic | Exon 5                                 | c.427G>A                               | p.Val143Met                            | Missense | Male   | Metastatic | Upper limb | Positive | None       |
