# Supplementary material for: Germline Genetic Mutations in Adult Patients with Sarcoma: Insight into the Middle East Genetic Landscape
Source: MDPI journal article supplement (doi:10.3390/cancers16091668), 2024-04-25
Supplement: s1 [file s1]

**Table-S1:** List of Tested Genes

**Expanded multi-cancer panel test:**

The full 84 multi-cancer genes panel:

|               |
|---------------|
| <i>AIP</i>    |
| <i>ALK</i>    |
| <i>APC</i>    |
| <i>ATM</i>    |
| <i>AXIN2</i>  |
| <i>BAP1</i>   |
| <i>BARD1</i>  |
| <i>BLM</i>    |
| <i>BMPR1A</i> |
| <i>BRCA1</i>  |
| <i>BRCA2</i>  |
| <i>BRIP1</i>  |
| <i>CASR</i>   |
| <i>CDC73</i>  |
| <i>CDH1</i>   |
| <i>CDK4</i>   |
| <i>CDKN1B</i> |
| <i>CDKN1C</i> |
| <i>CDKN2A</i> |
| <i>CEBPA</i>  |
| <i>CHEK2</i>  |
| <i>CTNNA1</i> |
| <i>DICER1</i> |
| <i>DIS3L2</i> |
| <i>EGFR</i>   |
| <i>EPCAM</i>  |
| <i>FH</i>     |
| <i>FLCN</i>   |
| <i>GATA2</i>  |
| <i>GPC3</i>   |
| <i>GREM1</i>  |
| <i>HOXB13</i> |
| <i>HRAS</i>   |
| <i>KIT</i>    |
| <i>MAX</i>    |
| <i>MEN1</i>   |
| <i>MET</i>    |
| <i>MITF</i>   |
| <i>MLH1</i>   |
| <i>MSH2</i>   |
| <i>MSH3</i>   |

|                |
|----------------|
| <i>MSH6</i>    |
| <i>MUTYH</i>   |
| <i>NBN</i>     |
| <i>NF1</i>     |
| <i>NF2</i>     |
| <i>NTHL1</i>   |
| <i>PALB2</i>   |
| <i>PDGFRA</i>  |
| <i>PHOX2B</i>  |
| <i>PMS2</i>    |
| <i>POLD1</i>   |
| <i>POLE</i>    |
| <i>POT1</i>    |
| <i>PRKAR1A</i> |
| <i>PTCH1</i>   |
| <i>PTEN</i>    |
| <i>RAD50</i>   |
| <i>RAD51C</i>  |
| <i>RAD51D</i>  |
| <i>RB1</i>     |
| <i>RECQL4</i>  |
| <i>RET</i>     |
| <i>RUNX1</i>   |
| <i>SDHA</i>    |
| <i>SDHAF2</i>  |
| <i>SDHB</i>    |
| <i>SDHC</i>    |
| <i>SDHD</i>    |
| <i>SMAD4</i>   |
| <i>SMARCA4</i> |
| <i>SMARCB1</i> |
| <i>SMARCE1</i> |
| <i>STK11</i>   |
| <i>SUFU</i>    |
| <i>TERC</i>    |
| <i>TERT</i>    |
| <i>TMEM127</i> |
| <i>TP53</i>    |
| <i>TSC1</i>    |
| <i>TSC2</i>    |
| <i>VHL</i>     |
| <i>WRN</i>     |
| <i>WT1</i>     |
